# Supplementary material
Source: HighWire-hosted journal article supplement (https://www.life-science-alliance.org/content/4/11/e202101034/F9)

**Figure 1B**

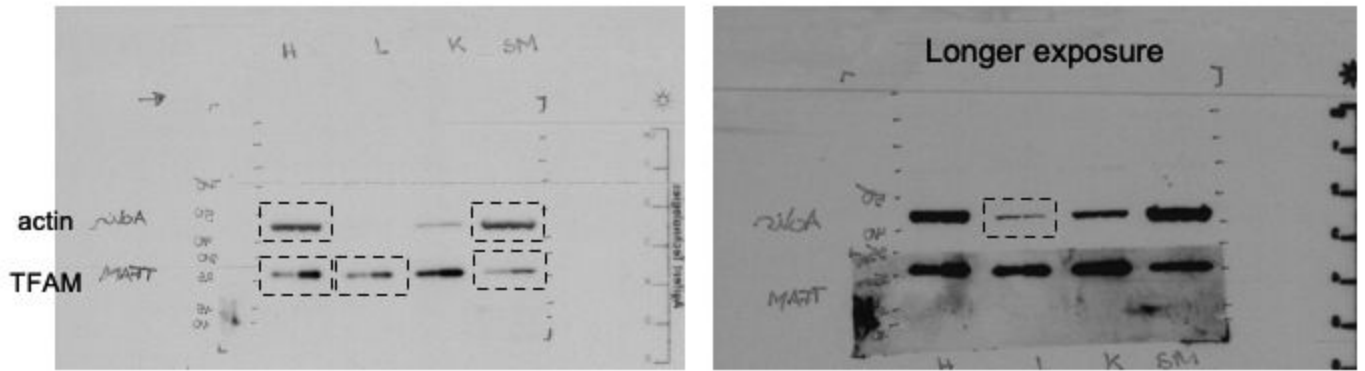

**Figure 1D**

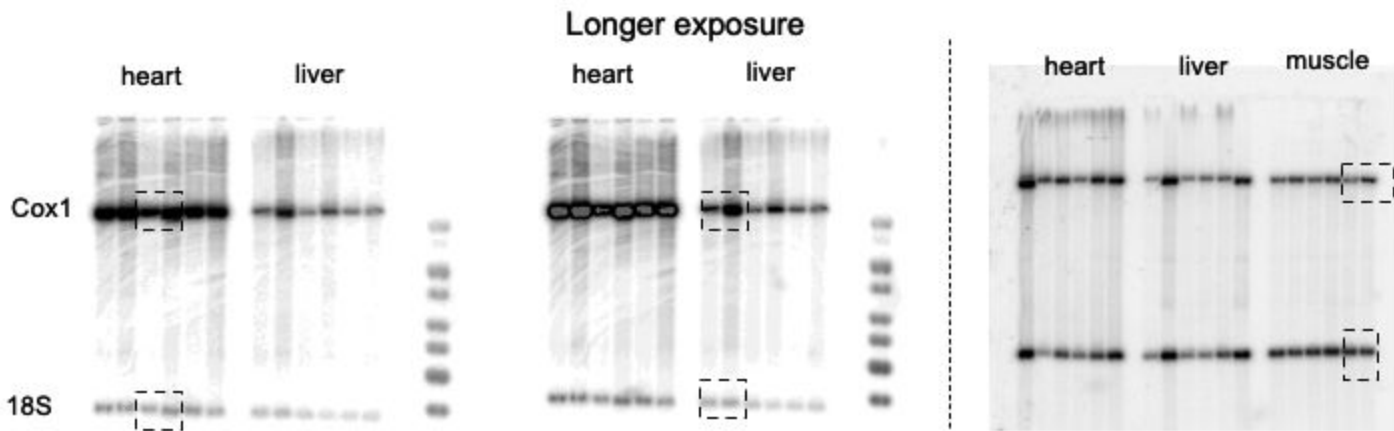

**Figure 1F**

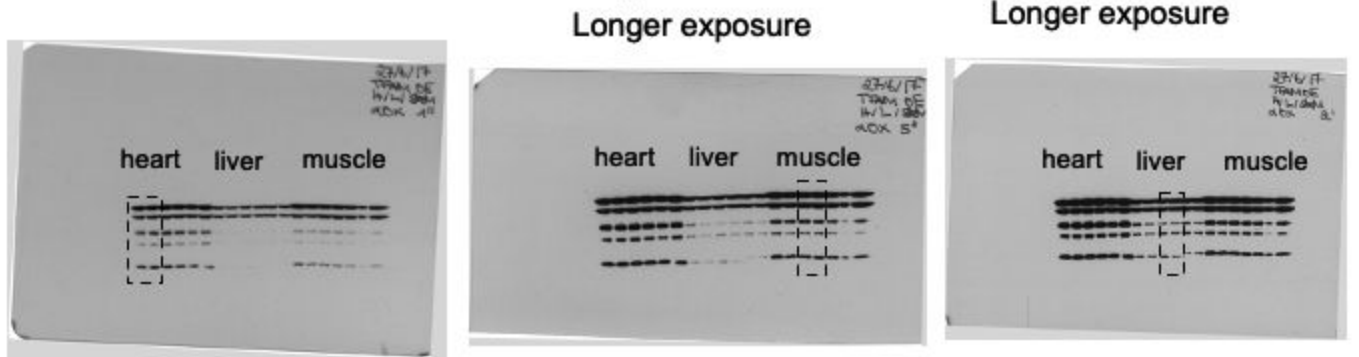

OXPHOS Cocktail

**Figure 3A**

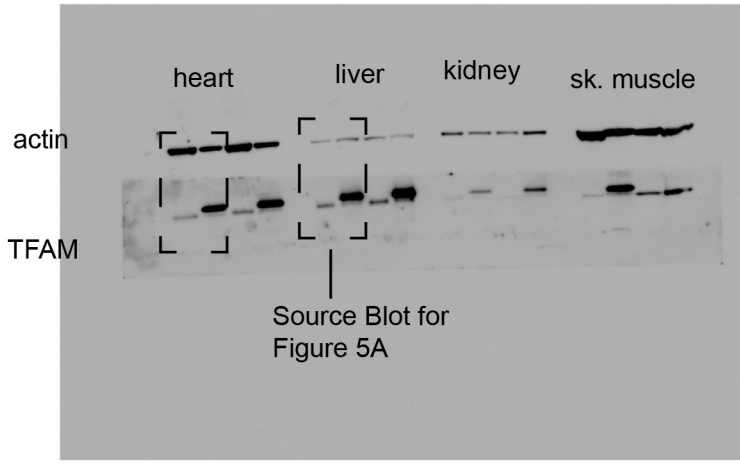

longer exposure

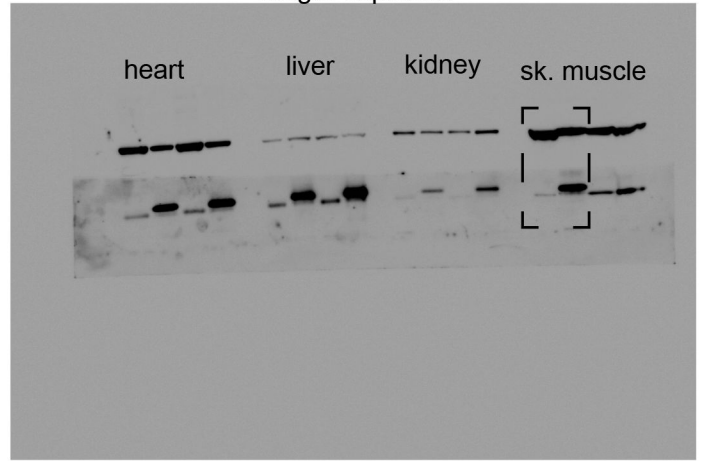

**Figure 3D**

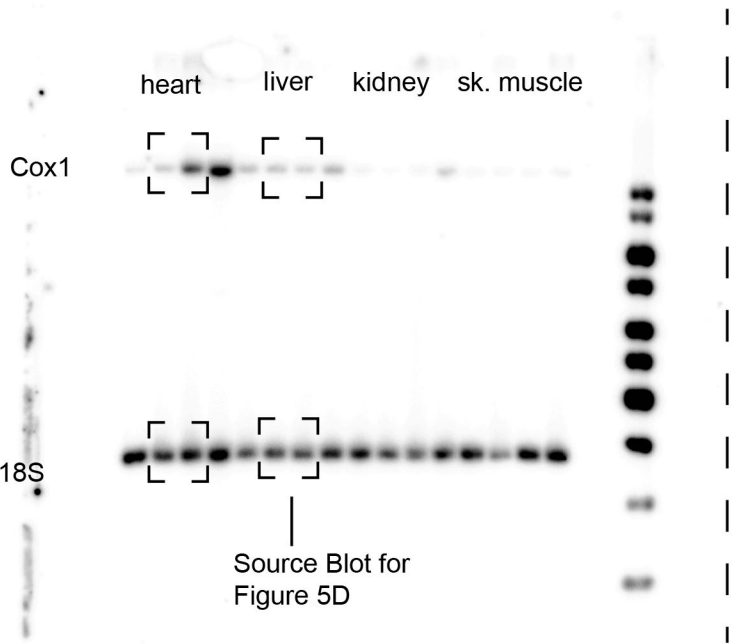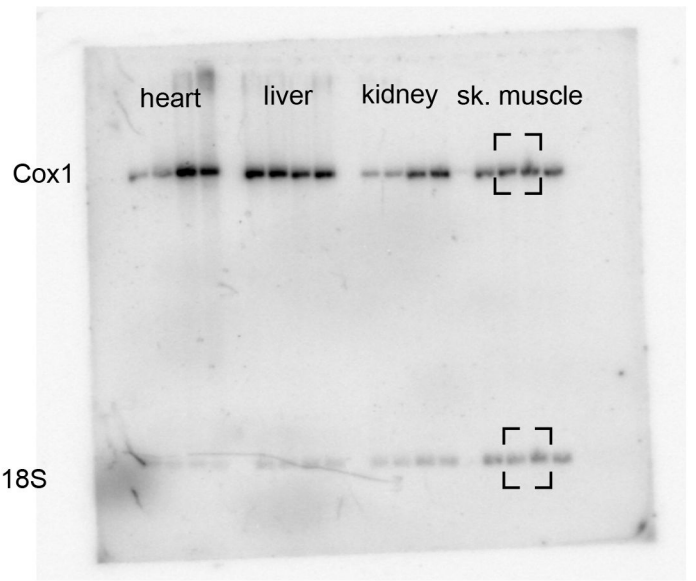

**Figure 3F**

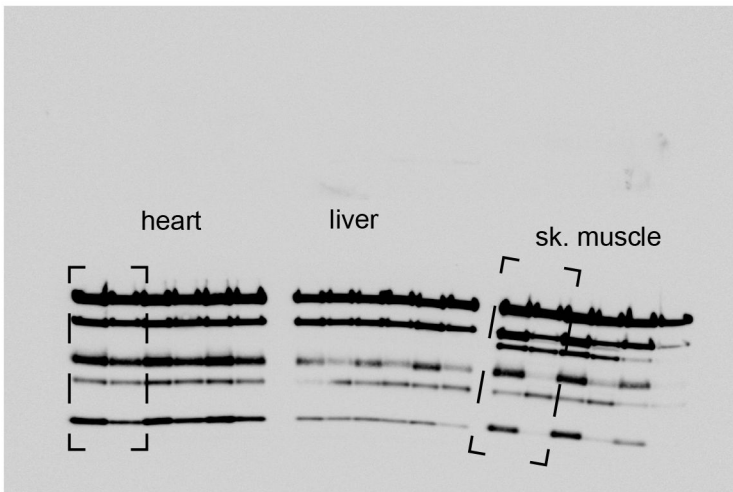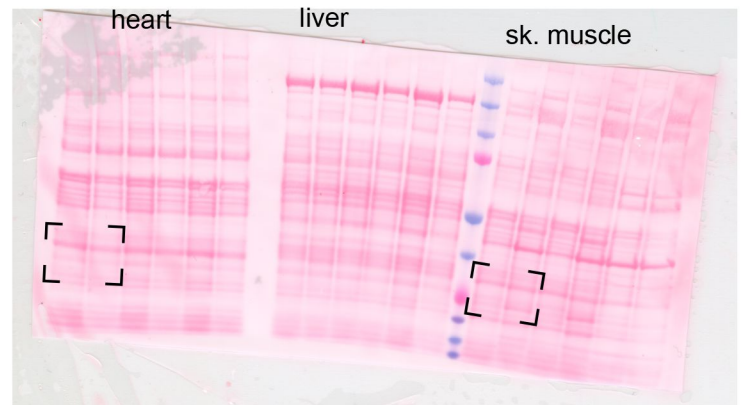

# Figure 5A and D

PLEASE REFER TO SOURCE BLOTS FOR FIGURE 3

## Figure 5F

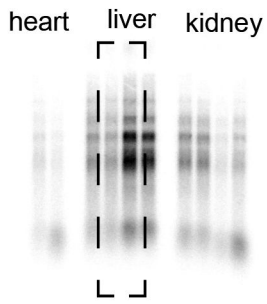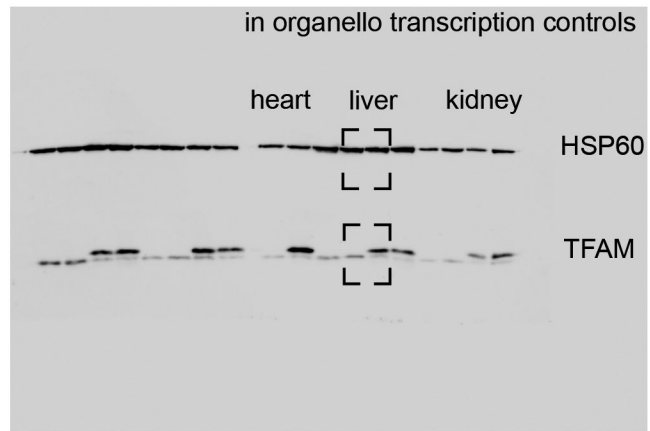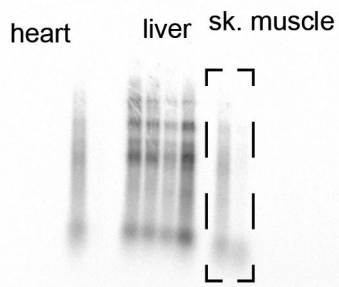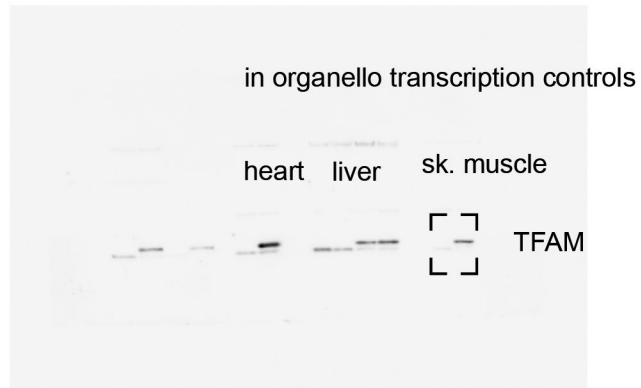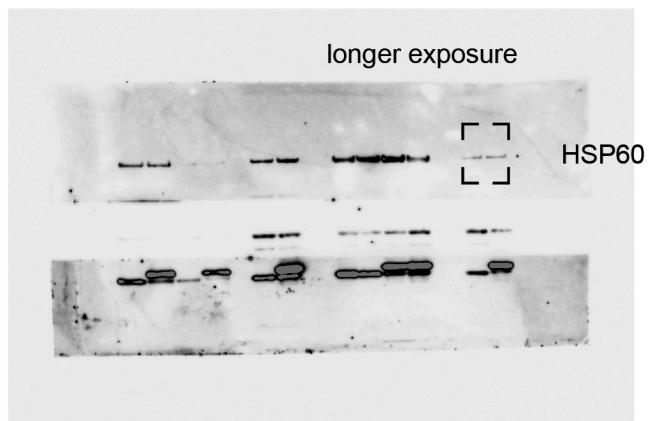

**Figure S1A**

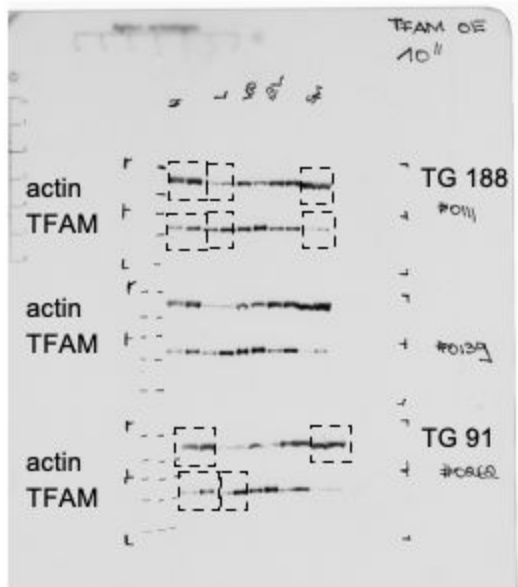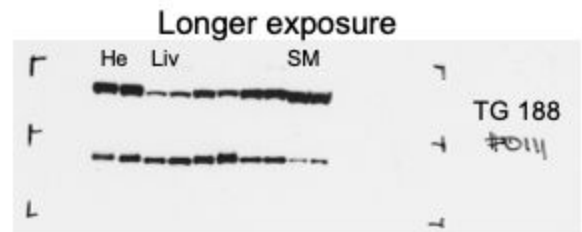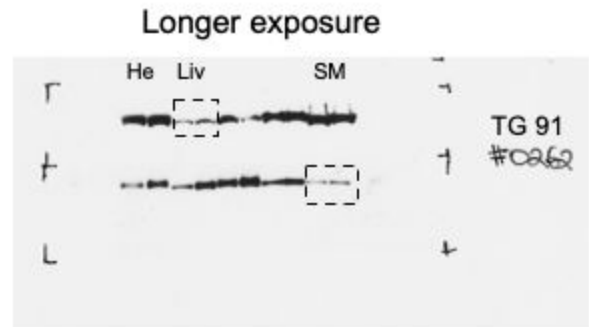

**Figure S1D**

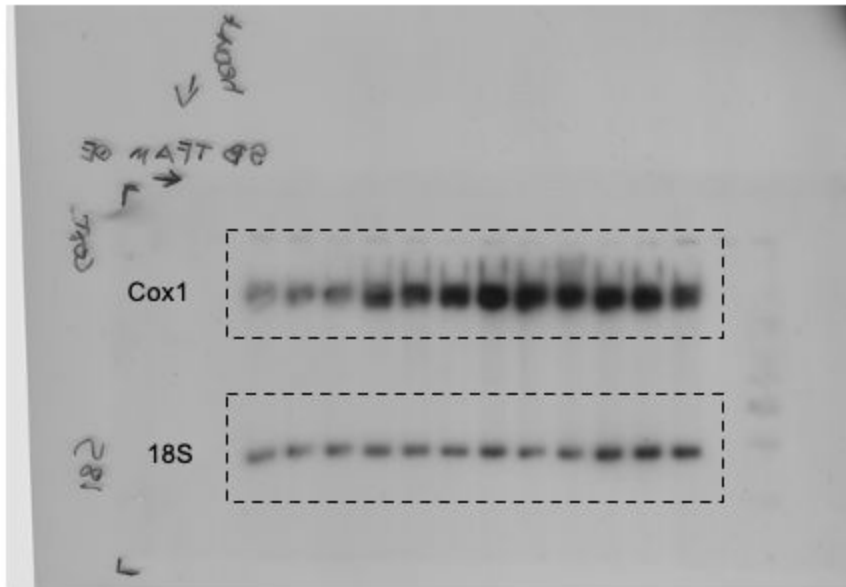

**Figure S1E**

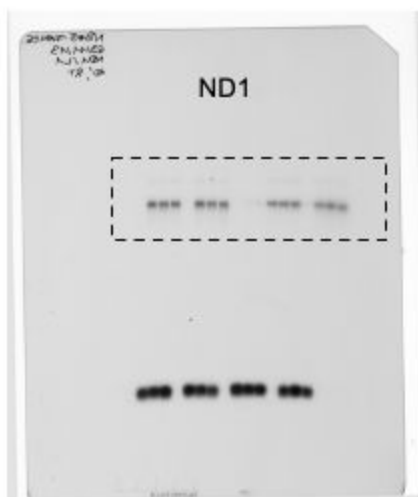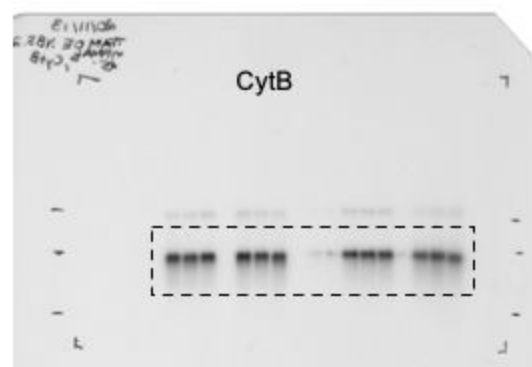

Figure S1E

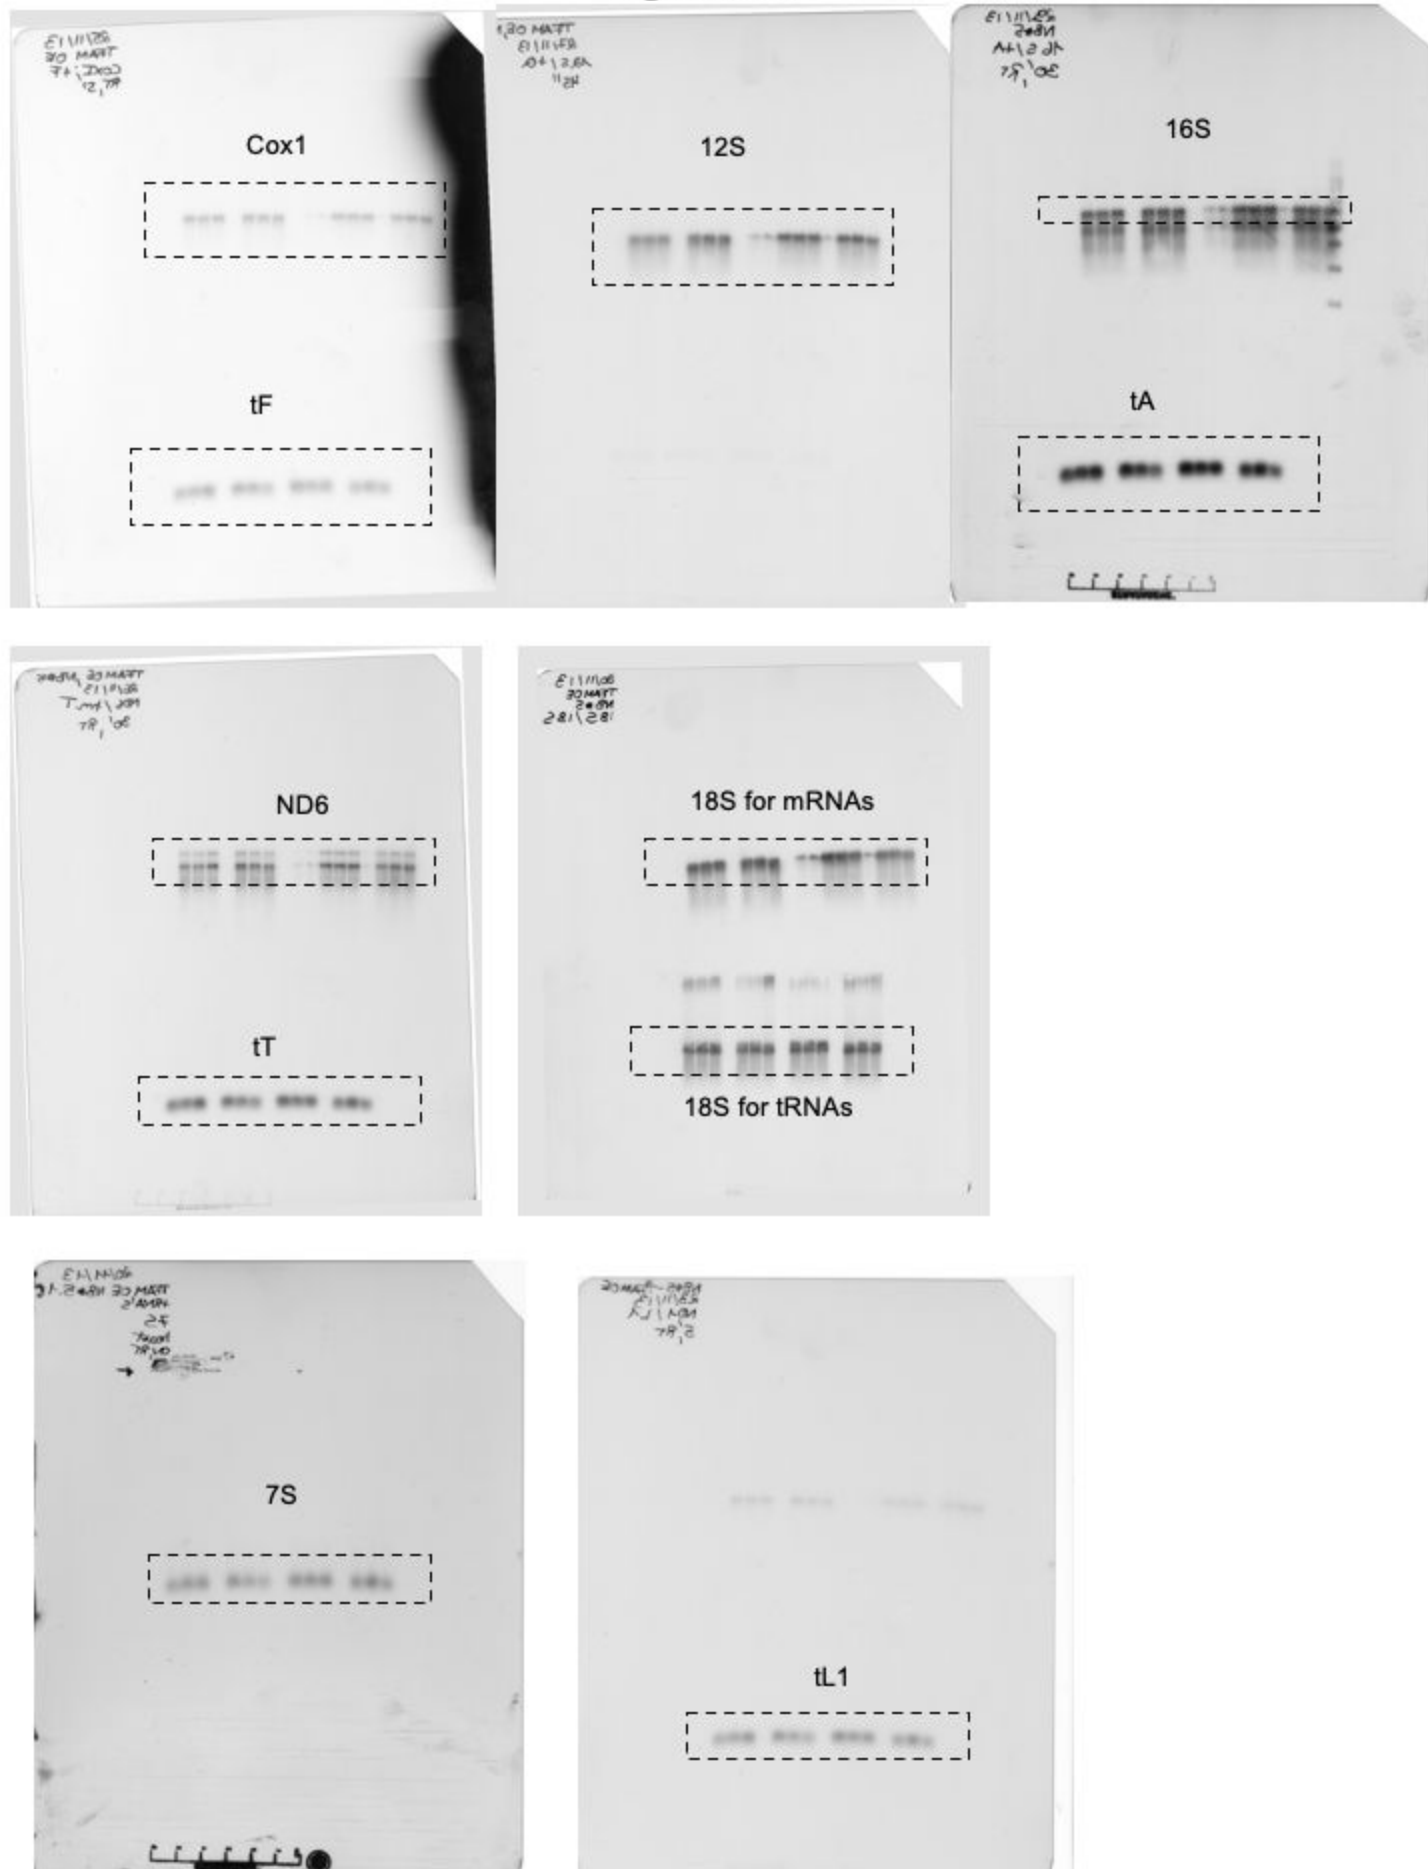

**Figure S3D**

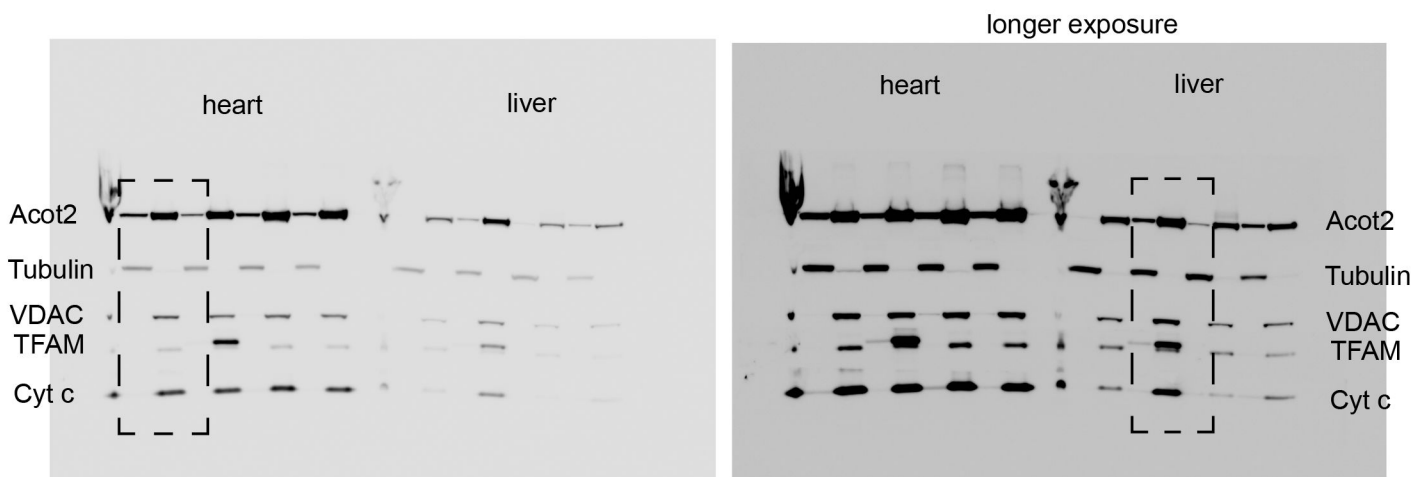

**Figure S3E**

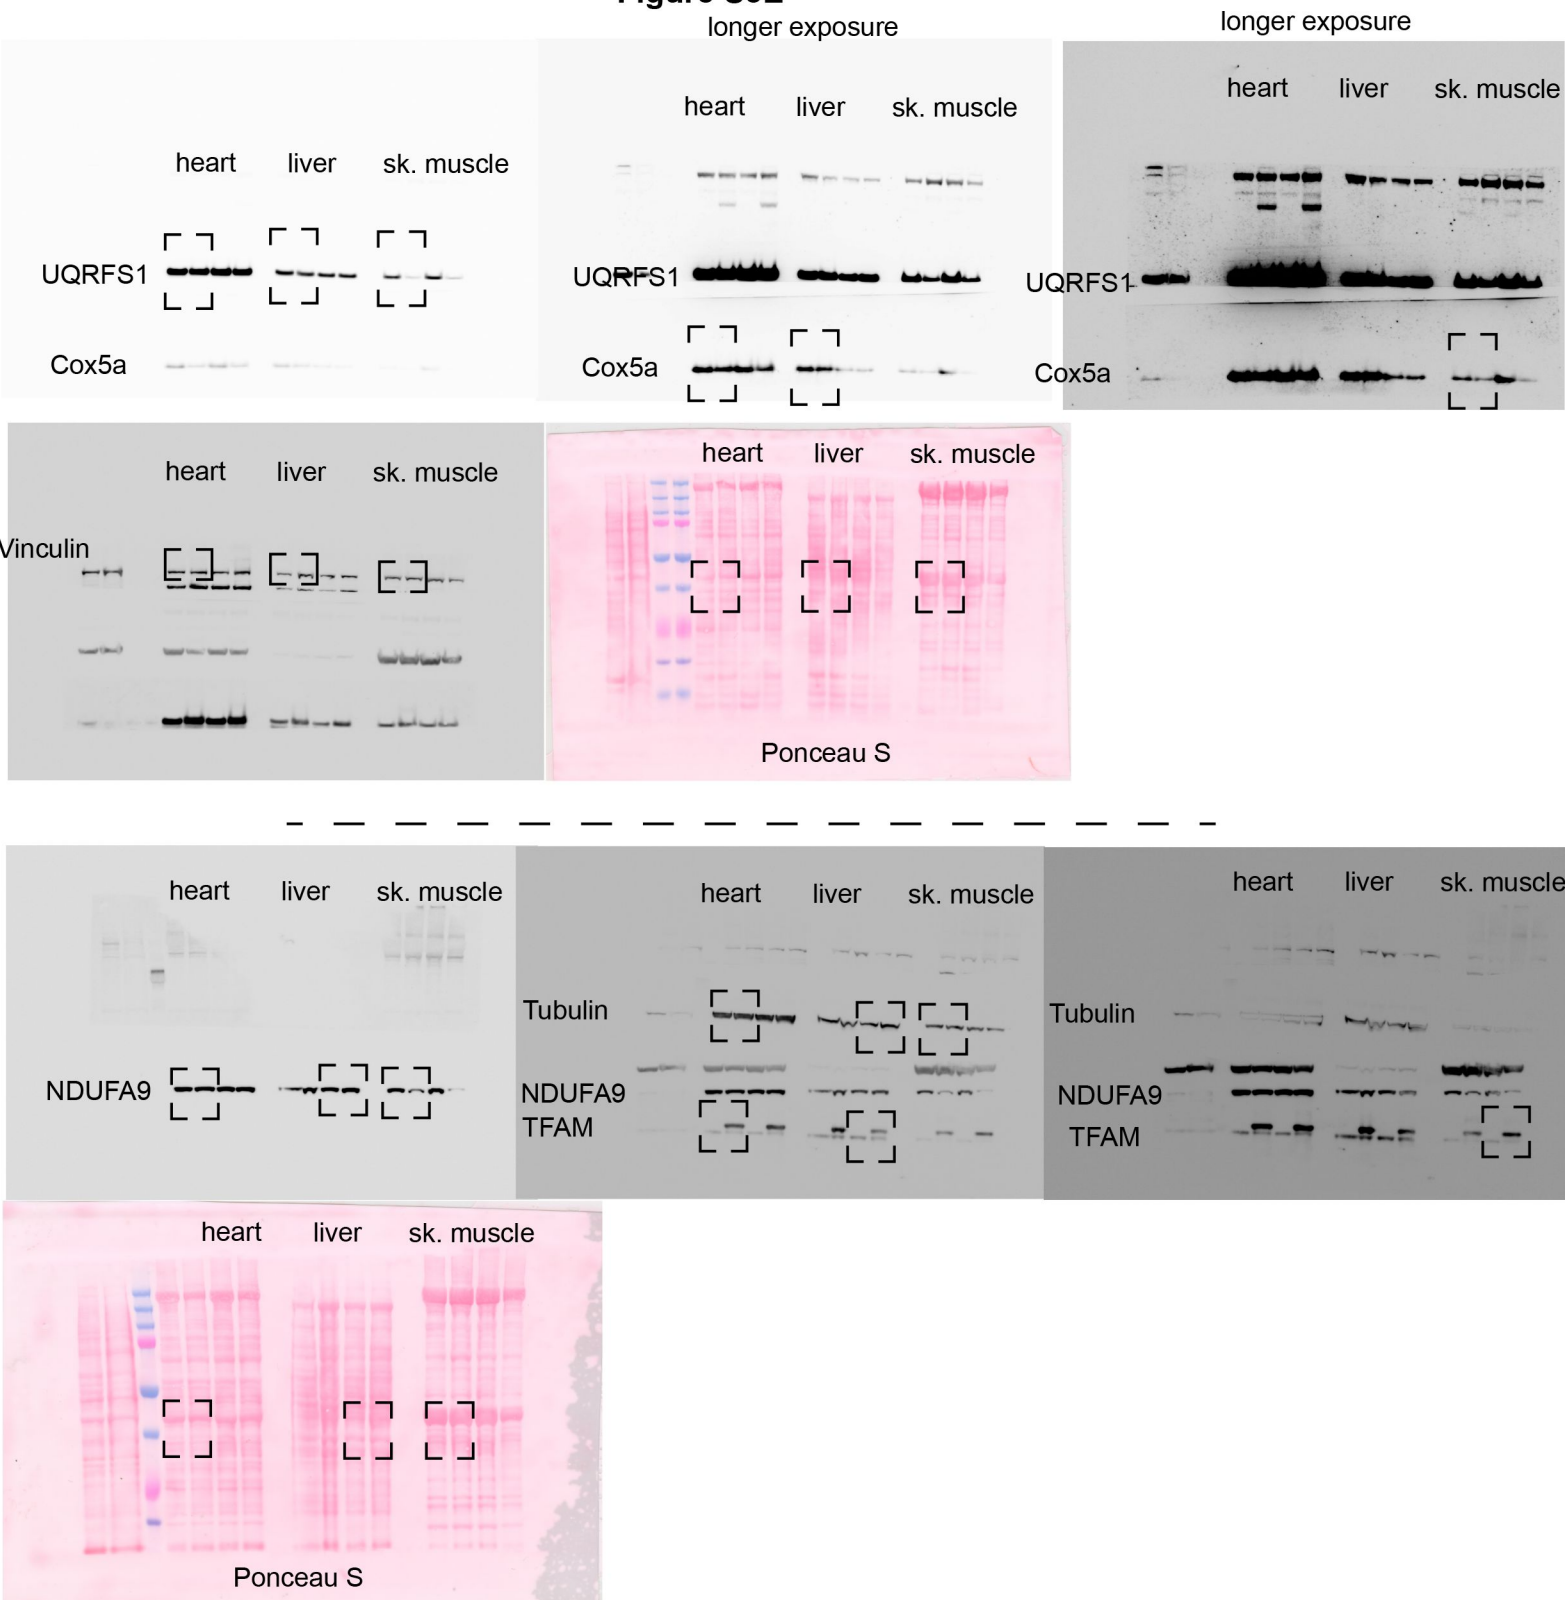



sk. muscle

**Figure S5B**

PhosTag Page

PhosTag Page

PhosTag Page

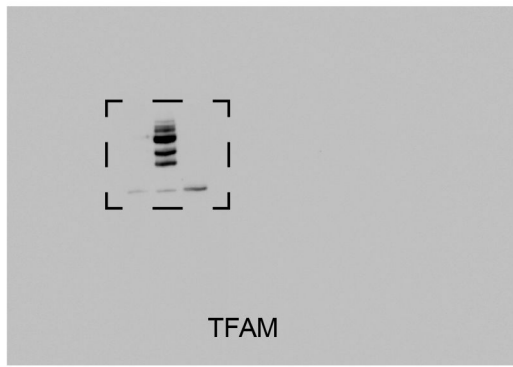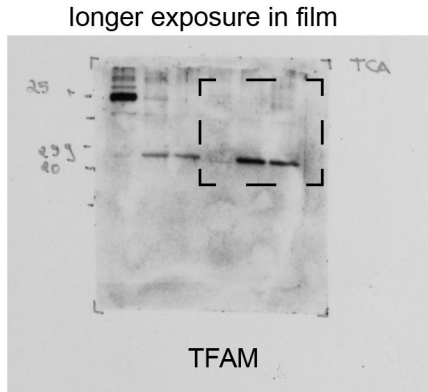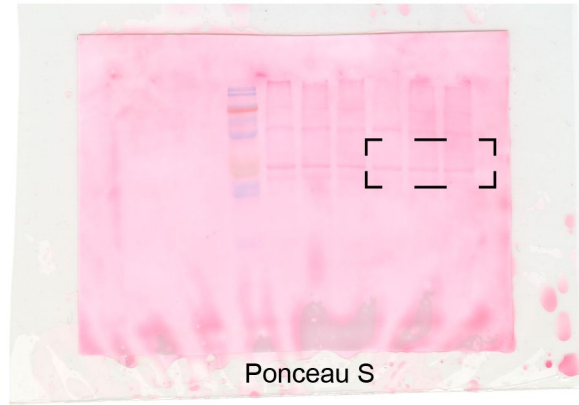

NuPage

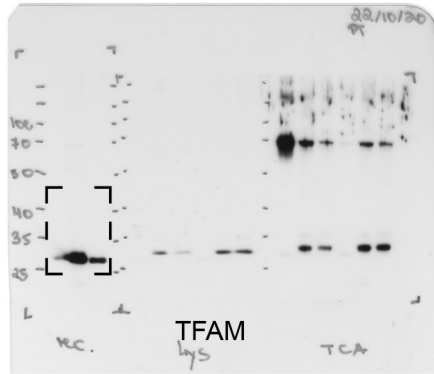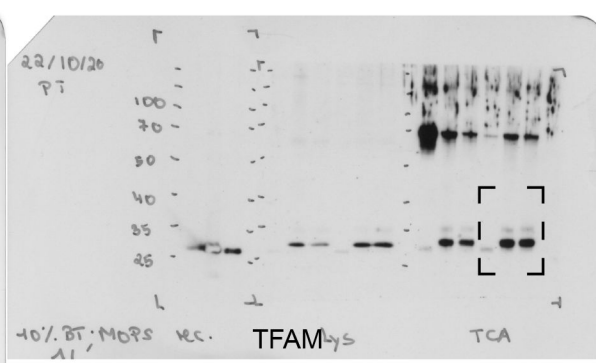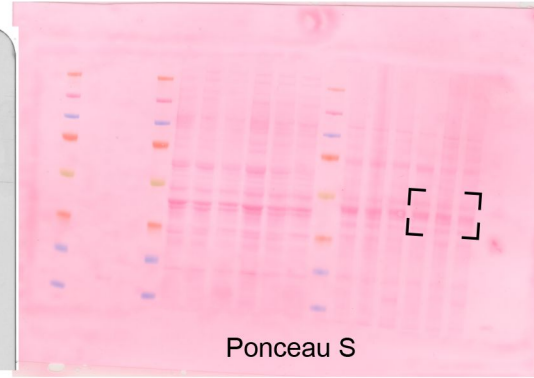

**Figure S5C**

liver

PhosTag Page

NuPage

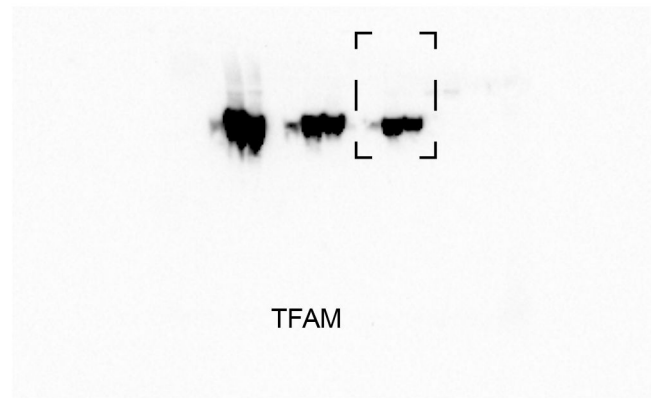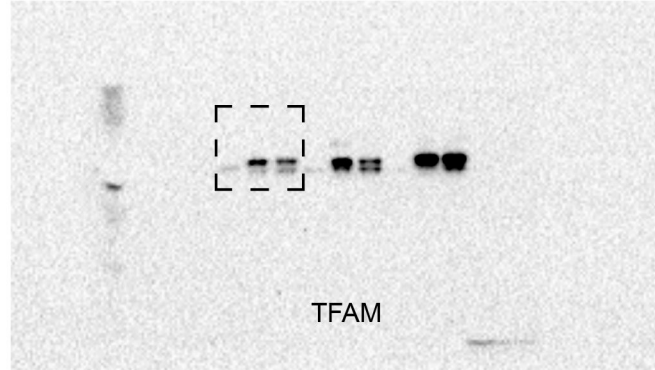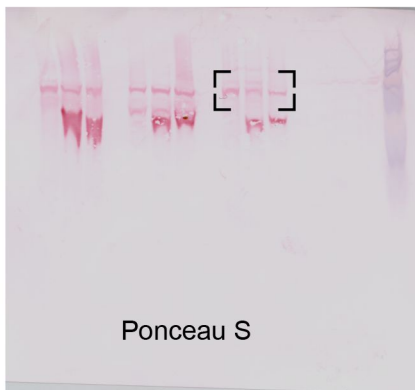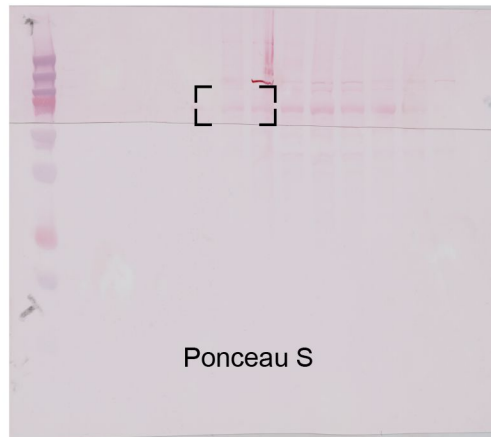

Supplement: inline-supplementary-material-11 [file inline-supplementary-material-11.pdf]
